# Supplementary material for: Structure-function relationships in glaucoma using enhanced depth imaging optical coherence tomography-derived parameters: a cross-sectional observational study
Source: BMC Ophthalmol. 2019 Feb 15;19:52. doi: 10.1186/s12886-019-1054-9 (PMC6377769; doi:10.1186/s12886-019-1054-9)
Supplement: Supplementary file 1 — Raw Data for BMC ophthalmology. Data of controls and glaucoma groups. (XLS 58 kb) [file 12886_2019_1054_MOESM1_ESM.xls]

## Sheet: glaucoma geral
	Grupo	prontuario	sexo 1-masc 0-fem	raca	idade	olho OD 1 OE 0	med	PIO	cg previa 1S 0N	MD	VFI	oct	volume tpl mm2	volume tpl mm2	VOL TPL MEDIO CONTROLE	MRW INF	MRW INF2	MEDIA MRW INF	MRW SUP	MRW SUP2	MEDIA MRW SUP	mb-mb	mb-mb2	Media mb-mb	mb-LC	mb-LC2	Media mb-LC	tpl	tpl2	Media TPL	LC	LC2	Media LC	área lc	área LC2	Media área LC	Dificuldade medida linear LC 1-Sim 0-Nao	diag	Grupo 0-nl 1- glaucoma	Biometria	paqui
1	glaucoma	1677165	1		64	1	2	17	0	0.43	100	88	0.39	0.46	0.425	282	286	284	180	183	181.5	1911	1920	1915.5	274	300	287	124	104	114	144	160	152	0.3	0.26	0.28	0	GPAA	1	23.9	537
2	glaucoma	1614929	0	B	75	0	2	16	1	-2.71	94	81	0.29	0.33	0.31	209	197	203	194	189	191.5	1528	1529	1528.5	283	288	285.5	88	100	94	144	192	168	0.28	0.21	0.245	0	GPAF	1	22.66	510
3	glaucoma	Unifesp	1	N	73	1	2	12	1	-2.75	97	86	0.52	0.58	0.55	195	186	190.5	252	265	258.5	1490	1511	1500.5	422	425	423.5	215	200	207.5	149	145	147	0.18	0.21	0.195	1	GPAA	1	22.9	516
4	glaucoma	1674108	1		78	0	1	14	1	-3.05	95	71	0.35	0.37	0.36	161	168	164.5	155	166	160.5	1677	1669	1673	237	240	238.5	96	94	95	100	136	118	0.17	0.21	0.19	0	GPAA	1	23.81
5	glaucoma	1636286	1	N	41	1	1	14	0	-3.79	88	65	0.48	0.54	0.51	157	172	164.5	274	258	266	1122	1125	1123.5	406	385	395.5	123	130	126.5	105	99	102	0.16	0.14	0.15	0	GPAA	1		495
6	glaucoma	173719	0	B	79	0	3	12	1	-4.01	95	58	0.51	0.51	0.51	211	210	210.5	127	129	128	1458	1462	1460	197	204	200.5	222	218	220	173	216	194.5	0.21	0.29	0.25	0	GPAA	1		502
7	glaucoma	Unifesp	1	P	72	1	1	14	0	-4.16	92	82	0.49	0.46	0.475	232	221	226.5	189	190	189.5	1650	1647	1648.5	269	269	269	93	90	91.5	170	179	174.5	0.27	0.29	0.28	1	GPAA	1	22.37	461
8	glaucoma	1654674	0		56	1	2	21	1	-4.42	93	69	0.29	0.35	0.32	215	206	210.5	176	168	172	1207	1216	1211.5	376	389	382.5	87	95	91	99	83	91	0.12	0.14	0.13	0	GPAF	1	22.28	488
9	glaucoma	1504046	1	B	67	1	1	17	1	-4.42	92	70	0.33	0.32	0.325	187	187	187	186	182	184	1616	1613	1614.5	371	368	369.5	102	105	103.5	116	108	112	0.15	0.16	0.155	0	GPAA	1		546
10	glaucoma	196348	1	N	63	1	2	23	0	-5.05	92	68	0.23	0.25	0.24	181	179	180	126	129	127.5	1616	1616	1616	547	542	544.5	40	34	37	174	145	159.5	0.26	0.22	0.24	0	GPAA	1	24.52	616
11	glaucoma	180249	1	N	73	1	2	16	1	-5.07	88	52	0.21	0.22	0.21	98	89	93.5	151	147	149	1694	1680	1687	590	564	577	74	89	81.5	178	123	150.5	0.28	0.23	0.255	0	gl secundario trauma	1	24.22	545
12	glaucoma	1673896	0	P	87	1	2	15	1	-5.19	84	74	0.3	0.32	0.31	68	54	61	275	289	282	1559	1607	1583	343	352	347.5	123	111	117	97	95	96	0.15	0.17	0.16	0	GPAA	1	22.34	520
13	glaucoma	1652594	1	B	55	1	0	14	1	-5.73	87	56	0.41	0.44	0.425	128	135	131.5	93	107	100	1639	1627	1633	393	393	393	120	135	127.5	159	131	145	0.22	0.24	0.23	0	GPAA	1	23.95	504
14	glaucoma	189765	1	A	66	1	3	13	0	-5.83	89	78	0.34	0.33	0.335	167	176	171.5	213	215	214	1449	1441	1445	395	381	388	58	67	62.5	128	146	274	0.16	0.21	0.185	1	GPAA		23.99	539
15	glaucoma	1500498	0	B	63	1	0	10	1	-6.02	89	76	0.29	0.3	0.295	173	177	175	137	152	144.5	1469	1376	1422.5	148	156	152	131	142	136.5	122	122	122	0.17	0.16	0.165	1	GPAA	1	22.56	554
16	glaucoma	1518039	0		69	1	2	17	1	-6.02	93	66	0.36	0.39	0.375	154	133	143.5	201	211	206	1641	1668	1654.5	455	455	455	81	90	85.5	140	96	118	0.14	0.2	0.17	1	GPAF	1	23.4	473
17	glaucoma	1674948	1	N	41	0	2	13		-6.57	77	81	0.29	0.34	0.315	197	184	190.5	310	285	297.5	1594	1616	1605	477	500	488.5	72	72	72	113	91	102	0.14	0.16	0.15	1	Gl secundario corticoide	1	24.45	423
18	glaucoma	1634380	1		45	0	3	16	0	-6.88	89	63	0.41	0.44	0.425	157	152	154.5	129	138	133.5	1873	1863	1868	382	400	391	190	180	185	175	148	161.5	0.22	0.31	0.265	0	GPAA	1		473
19	glaucoma	1682726	1	P	70	0	2	14	0	-7.45	86	58	0.17	0.16	0.165	109	103	106	127	123	125	1335	1339	1337	421	421	421	48	54	51	178	158	168	0.23	0.2	0.215	1	GPAA	1	23.34	522
20	glaucoma	185591	1	B	63	1	2	13	1	-7.45	86	80	0.42	0.43	0.425	191	191	191	179	182	180.5	1807	1804	1805.5	699	696	697.5	120	132	126	135	135	135	0.34	0.26	0.3	1	GPAA	1	24.04	525
21	glaucoma	1514551	0		33	0	2	14	0	-8.36	83	77	0.39	0.35	0.37	257	273	265	242	226	234	1697	1691	1694	435	432	433.5	44	44	44	115	118	116.5	0.18	0.17	0.175	0	GPAA	1		488
22	glaucoma	1517690	1	B	75	0	0	7	1	-8.42	81	47	0.37	0.4	0.385	177	185	181	193	210	201.5	1538	1507	1522.5	114	117	115.5	108	140	124	150	173	161.5	0.19	0.25	0.22	1	GPAF	1	21.92	542
23	glaucoma	1708550	1	N	63	0	1	19	0	-8.95	73	68	0.33	0.32	0.325	154	149	151.5	184	189	186.5	1483	1470	1476.5	440	443	441.5	103	103	103	94	82	88	0.18	0.17	0.175	1	GPAA	1	23.73	435
24	glaucoma	1612516	1	P	61	0	0	12	0	-8.99	80	60	0.39	0.36	0.375	180	168	174	191	189	190	2062	2050	2056	202	196	199	58	55	56.5	167	170	168.5	0.27	0.26	0.265	0	GPAA	1	23.43
25	glaucoma	127352	0	P	59	1	2	14	0	-9.11	81	63	0.25	0.3	0.275	155	151	153	50	35	42.5	1658	1652	1655	512	506	509	50	38	44	138	141	139.5	0.22	0.22	0.22	0	GPAA	1	22.81	487
26	glaucoma	1659058	1	N	65	1	3	15	0	-10.37	63	56	0.21	0.21	0.21	158	165	161.5	138	143	140.5	1441	1450	1445.5	592	593	592.5	52	51	51.5	119	119	119	0.14	0.15	0.145	0	GPAA	1		483
27	glaucoma	unifesp	0	B	84	1	0	6	1	-10.85	65	61	0.27	0.27	0.27	58	59	58.5	175	169	172	1709	1718	1713.5	413	416	414.5	47	41	44	142	150	146	0.3	0.28	0.29	0	GPAA	1	23.89	463
28	glaucoma	180416	1	B	71	1	0	14	1	-12.09	73	50	0.22	0.29	0.255	176	180	178	167	157	162	1302	1311	1306.5	329	335	332	32	29	30.5	140	146	143	0.12	0.14	0.13	0	GPAF	1	22.86	583
29	glaucoma	1600039	0	A	76	0	1	16	1	-12.61	58	65	0.19	0.21	0.2	122	131	126.5	107	102	104.5	1632	1608	1620	389	391	390	78	72	75	168	165	166.5	0.2	0.16	0.18	0	GPAF	1	22.82	511
30	glaucoma	1535551	1	B	73	0	2	14	1	-13.71	65	65	0.3	0.32	0.31	109	104	106	125	128	126.5	1324	1321	1322.5	95	95	95	179	190	184.5	161	145	153	0.15	0.15	0.15	0	GPAA	1	23.03	501
31	glaucoma	1526093	1	B	56	1	3	16	1	-13.9	59	51	0.28	0.29	0.285	54	55	54.5	96	98	97	1152	1140	1146	397	386	391.5	187	202	194.5	61	55	58	0.08	0.08	0.08	0	GPAA	1		519
32	glaucoma	1638630	1	B	69	1	2	13	1	-14.5	56	91	0.28	0.28	0.28	53	62	57.5	72	75	73.5	1735	1726	1730.5	243	234	238.5	120	129	124.5	149	120	134.5	0.16	0.23	0.195	1	gl secundario	1		503
33	glaucoma	198242	0	P	76	1	2	13	0	-14.84	64	51	0.11	0.11	0.11	57	53	55	24	21	22.5	1766	1769	1767.5	182	179	180.5	50	50	50	211	159	185	0.29	0.28	0.285	0	GPAA	1		494
34	glaucoma	Unifesp	0	P	70	0	4	15	1	-16.98	45	58	0.27	0.22	0.245	58	34	46	173	157	165	1512	1510	1511	328	308	318	111	123	117	175	173	174	0.29	0.22	0.255	0	GPAF	1	22.34	493
35	glaucoma	1545480	1		59	1	1	11	1	-18.57	38	57	0.32	0.42	0.37	179	159	169	128	123	125.5	1569	1549	1559	801	801	801	45	40	42.5	160	141	150.5	0.16	0.16	0.16	1	Gl pigmentar	1		528
36	glaucoma	1529116	1	B	52	0	0	10	1	-19.48	37	41	0.27	0.26	0.265	52	47	49.5	99	99	99	1888	1878	1883	436	449	442.5	49	55	52	137	103	120	0.18	0.2	0.19	1	GPAA	1		519
37	glaucoma	1520237	1	B	51	0	0	12	1	-21.05	38	60	0.36	0.38	0.37	136	153	144.5	134	145	139.5	1880	1876	1878	242	282	262	150	92	121	144	131	137.5	0.21	0.29	0.25	1	GPAA	1	22.5	555
38	glaucoma	1678023	1	B	69	0	0	12	1	-21.41	20	55	0.15	0.27	0.21	96	92	94	87	91	89	1654	1663	1658.5	524	518	521	85	84	84.5	105	108	106.5	0.2	0.13	0.165	0	GPAF	1	23.14
39	glaucoma	194606	0	N	70	1	3	14	1	-24.99	26	46	0.2	0.36	0.28	157	168	162.5	105	96	100.5	1723	1731	1727	422	439	430.5	73	61	67	174	177	175.5	0.22	0.2	0.21	0	GPAA	1	21.38	534

## Sheet: controle normal
	grupo	prontuario	sexo 1-masc 0-fem	raca	idade	olho OD 1 OE 0	med	PIO	cg previa 1S 0N	qual cg?	MD	VFI	oct	volume tpl mm2	volume tpl mm2	VOL TPL MEDIO CONTROLE	MRW INF	MRW INF2	MEDIA MRW INF	MRW SUP	MRW SUP2	MEDIA MRW SUP	mb-mb	mb-mb2	Media mb-mb	mb-LC	mb-LC2	Media mb-LC	tpl	tpl2	Media TPL	LC	LC2	Media LC	área lc	área LC2	Media área LC	Dificuldade medir LC 1-Sim 0-Nao	Grupo 0-nl 1- glaucoma	Biometria	paqui
1	normal	1672437	0	B	47	0	0	12	0				106	0.48	0.41	0.445	312	305	308.5	319	334	326.5	1371	1331	1351	227	239	233	156	136	146	145	74	109.5	0.28	0.13	0.205	1	0	23.43	478
2	normal	1658061	0	B	80	0	0	13	1	faco	-0.34	100	97	0.46	0.46	0.46	228	221	224.5	268	266	267	1682	1714	1698	287	290	288.5	96	96	96	162	156	159	0.21	0.2	0.205	0	0	22.04	507
3	normal	1623068	1		72	1	0	17	1	faco			133	0.79	0.75	0.77	380	371	375.5	439	451	445	1553	1529	1541	213	210	211.5	190	198	194	216	213	214.5	0.32	0.35	0.335	0	0	23.89	518
4	normal	1649924	0		57	1	0	14	1	faco			102	0.62	0.6	0.61	338	322	330	377	374	375.5	1248	1236	1242	0	0	0	379	399	389	229	254	241.5	0.29	0.28	0.285	0	0	22.52	588
5	normal	1663170	0	B	73	1	0	12	1	faco				0.66	0.68	0.67	320	321	320.5	382	379	380.5	1269	1232	1250.5	0	0	0	415	429	422	169	137	153	0.2	0.24	0.22	0	0	21.19
6	normal	1659072	1	P	69	0	0	14	0				101	0.58	0.52	0.55	246	248	247	339	347	343	1283	1332	1307.5	0	0	0	262	257	259.5	121	158	139.5	0.19	0.12	0.155	0	0	23.18	501
7	normal	1651483	0	P	56	0	0	20	1	faco			94	0.73	0.69	0.69	391	374	382.5	367	373	370	1897	1935	1916	190	196	193	167	154	160.5	190	193	191.5	0.37	0.36	0.365	0	0	22.55	561
8	normal	1651690	0	N	75	1	0	16	1	faco				0.88	0.9	0.89	378	378	378	381	375	378	1458	1461	1459.5	0	0	0	456	482	469	111	178	144.5	0.17	0.24	0.205	1	0	22.72	528
9	normal	unifesp	0	P	61	1	0	12	0		-0.45	98	103	0.39	0.42	0.405	234	231	232.5	235	258	246.5	1379	1388	1383.5	293	290	291.5	86	86	86	142	137	139.5	0.23	0.21	0.22	0	0	21.83	525
10	normal	1615498	0	A	63	1	0	14	1	faco			96	0.46	0.46	0.46	285	288	286.5	298	300	299	1405	1399	1402	457	457	457	74	71	72.5	157	146	151.5	0.24	0.19	0.215	1	0	24.08	580
11	normal	214852	0		59	1	0	12	0		-1.14	99	114	0.77	0.76	0.765	327	337	332	378	340	359	1531	1482	1506.5	0	0	0	452	475	463.5	137	133	135	0.2	0.19	0.195	1	0		527
12	normal	1667626	1		68	1	0	14	0				88	0.37	0.38	0.38	214	325	269.5	283	271	277	1592	1434	1513	234	248	241	90	93	91.5	115	107	111	0.14	0.24	0.19	1	0
13	normal	120738	1	B	63	0	0	16	0				103	0.7	0.67	0.685	347	329	338	299	299	299	1659	1649	1654	430	433	431.5	190	201	195.5	182	154	168	0.25	0.27	0.26	0	0	23.43	577
14	normal	158587	1	B	55	0	0	17	1	faco			106	0.48	0.45	0.45	344	346	345	363	368	365.5	1416	1407	1411.5	342	342	342	95	86	90.5	125	137	131	0.23	0.24	0.235	0	0	22.23	543
15	normal	unifesp	0	B	60	0	0		0				109	0.89	0.89	0.89	357	339	348	425	408	416.5	1670	1649	1659.5	0	0	0	417	439	428	130	130	130	0.21	0.24	0.225	1	0
16	normal	unifesp	0	B	60	0	0	14	1	faco	-2.15	99	126	0.92	0.96	0.96	393	396	394.5	376	386	381	1558	1596	1577	0	0	0	529	517	523	190	159	174.5	0.29	0.33	0.31	0	0	22.18	605
17	normal	unifesp	0	N	41	0	0	12	0		-0.84	99	93	0.82	0.75	0.75	466	459	462.5	416	414	415	1387	1402	1394.5	0	0	0	361	364	362.5	171	170	170.5	0.25	0.24	0.245	0	0	22.95	531
18	normal	1539813	0	P	55	1	0	17	0				101	1.01	1.03	1.03	443	452	447.5	424	431	427.5	1330	1286	1308	0	0	0	770	751	760.5	131	179	155	0.18	0.21	0.195	1	0	22.75	607
19	normal	1670733	0		73	1	0	14	1	faco			117	0.53	0.56	0.56	407	357	382	356	354	355	1641	1630	1635.5	242	236	239	71	77	74	207	204	205.5	0.25	0.3	0.275	1	0	22.95	561
20	normal	1502322	1	B	62	0	0	14	0		-2.19	97	99	0.74	0.76	0.76	317	308	312.5	307	306	306.5	1176	1187	1181.5	0	0	0	532	526	529	191	194	192.5	0.26	0.27	0.265	0	0	24	571
21	normal	1677280	1	P	40	0							92	0.76	0.73	0.745	342	333	337.5	288	288	288	1742	1734	1738	248	248	248	190	173	181.5	103	141	122	0.15	0.23	0.19	1	0	22.69	548
22	normal	1603138	1		54	0	0	16	1	faco	-1.36	100	80	0.59	0.58	0.58	285	287	286	280	273	276.5	1571	1582	1576.5	218	218	218	139	131	135	200	208	204	0.25	0.25	0.25	0	0	23.81	558
23	normal	1607776	0	N	45	1	0	14	0		0.01	100	129	0.73	0.69	0.69	387	408	397.5	330	346	338	1753	1765	1759	147	148	147.5	208	205	206.5	189	181	185	0.25	0.29	0.27	1	0		518
24	normal	1544243	0	P	44	1	0	15	1	faco	-0.08	100	83	0.45	0.56	0.56	377	356	366.5	337	345	341	1358	1350	1354	142	148	145	122	107	114.5	159	214	186.5	0.25	0.18	0.215	0	0	23.04
25	normal	unifesp	1	P	55	1	0	14	0		-0.54	99	81	0.52	0.51	0.515	273	253	263	255	263	259	1188	1173	1180.5	211	211	211	235	244	239.5	181	166	173.5	0.2	0.18	0.19	0	0	25.19	552
26	normal	unifesp	0	B	52	0	0	12	0		-1.99	98	109	0.46	0.46	0.46	233	286	259.5	254	254	254	1605	1573	1589	376	382	379	70	90	80	134	128	131	0.21	0.19	0.2	1	0	25.09	534
27	normal	1513152	0	B	82	1	0	12	1	faco			100	0.57	0.56	0.565	252	257	254.5	198	198	198	1518	1520	1519	0	0	0	318	312	315	174	178	176	0.25	0.25	0.25	0	0	22.96	518
28	normal	1628923	1	A	75	1	0	12	1	Faco			116	0.49	0.47	0.48	332	353	342.5	297	295	296	1580	1574	1577	35	26	30.5	193	205	199	213	202	207.5	0.28	0.29	0.285	0	0	23	515
29	normal	1548008	0	B	59	1	0	18	irido		-1.66	100	108	0.69	0.7	0.695	324	317	320.5	324	323	323.5	1324	1311	1317.5	0	0	0	408	395	401.5	175	153	164	0.28	0.23	0.255	0	0		554
30	normal	151680	0	B	66	1	0	12	1	faco irido			85	0.95	0.98	0.965	327	328	327.5	401	402	401.5	1617	1606	1611.5	0	0	0	501	504	502.5	229	182	205.5	0.3	0.28	0.29	0	0	22.08	576
31	normal	135038	0	P	55	1	0	10	0				91	0.51	0.53	0.52	321	316	318.5	230	236	233	1488	1466	1477	429	449	439	105	111	108	153	145	149	0.23	0.26	0.245	1	0	24.6	556
32	normal	1609350	1	B	71	0	0	20	1	faco	-1.9	98	77	0.55	0.63	0.59	250	256	253	301	286	293.5	1674	1654	1664	96	93	94.5	180	189	184.5	157	160	158.5	0.26	0.27	0.265	1	0	23.27	555
33	normal	1687625	1	P	61	0	0	12	1	faco			113	0.8	0.81	0.805	364	364	364	375	380	377.5	1547	1544	1545.5	0	0	0	414	415	414.5	189	187	188	0.28	0.29	0.285	0	0	23.16	531
34	normal	1545002	0	B	57	0	0	12	0		0.35	100	82	0.64	0.59	0.615	318	312	315	308	314	311	1617	1614	1615.5	58	67	62.5	269	242	255.5	163	143	153	0.26	0.2	0.23	0	0		581
